# Supplementary material for: Direct palladium-catalyzed alkenylation, benzylation and alkylation of ethyl oxazole-4-carboxylate with alkenyl-, benzyl- and alkyl halides
Source: Royal Society of Chemistry journal article supplement (doi:10.1039/b816374j), 2009-01-01

## Electronic Supplementary Information

# Direct palladium-catalyzed alkenylation, benzylation and alkylation of ethyl oxazole-4-carboxylate with alkenyl-, benzyl- and alkyl halides

Cécile Verrier, Christophe Hoarau,<sup>\*</sup> and Francis Marsais

Institut de Chimie Organique Fine (IRCOF) associé au CNRS (UMR 6014), INSA et  
Université de Rouen, BP08 76131 Mont Saint Aignan, France

### Contents

- General & experimental procedures with all spectral data

### Experimental Section

### General Informations

Dioxane was distilled from benzophenone/Na and toluene was distilled from calcium hydride. Melting points are uncorrected. Column chromatography was performed using silica gel (mesh size 60-80 mesh). <sup>1</sup>H NMR and <sup>13</sup>C NMR spectra were recorded at 300 MHz. Chemical shifts (δ) are given as ppm relative to the residual solvent peak. Microanalyses were carried out at the analytical laboratory of our Department (IRCOF). The ethyl oxazole-4-carboxylate **1** was prepared according literature.<sup>1</sup> Commercially available alkenyl-, benzyl-, allyl- and alkyl halides, 2-(dicyclohexylphosphino)biphenyl (JohnPhos Buchwald's ligand), Hermann-Beller's palladacycle and 1,3-bis-(mesitylimidazolyl)carbene (IMes) were used without further purification.

---

<sup>1</sup> C. Hoarau, A. Du Fou de Kerdaniel, N. Bracq, P. Grandclaoudon, A. Couture, F. Marsais, *Tetrahedron Lett.* 2005, **46**, 8573.

## General procedure for direct vinylation, benzylation and alkylation of ethyl oxazole-4-carboxylate **1** with vinyl-, benzyl- and alkylhalides

The direct (hetero)vinylation and alkylation reactions were carried out in a sealed tube at 110 °C for 18 h under Ar. A solution of ethyl oxazole-4-carboxylate (50 mg, 0.35 mmol) was allowed to react with vinyl or alkyl halide (2 equiv.) with palladium acetate (4 mg, 0.017 mmol), cesium carbonate (231 mg, 0.70 mmol) and 2-(dicyclohexylphosphino)biphenyl (12 mg, 10 mol %) in dioxane (1 ml). After filtration on Celite and concentration under vacuo, the crude product was purified by flash column chromatography on silica gel using a mixture of ethyl acetate (AcOEt) and petroleum ether (P) as the eluent to give the ethyl oxazole-4-carboxylate derivatives **3a-n**. The following detailed procedures are given using optimized experimental conditions (Table 1).

### Ethyl 2-(2-methylprop-1-enyl)oxazole-4-carboxylate (**3a**)

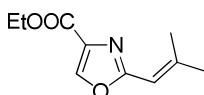

According the general procedure using **1** with 1-bromo-2-methylpropene (72  $\mu$ l, 0.70 mmol). Standard workup followed by flash chromatography (AcOEt/PE 1:9, Rf = 0.33) afforded **3a** (100%) as a colourless oil.  $^1\text{H}$  NMR ( $\text{CDCl}_3$ , 300 MHz)  $\delta$  = 1.36 (t, 3H,  $J$  = 7.1 Hz), 1.96 (s, 3H), 2.21 (s, 3H), 4.36 (q, 2H,  $J$  = 7.1 Hz), 6.13 (s, 1H), 8.11 (s, 1H);  $^{13}\text{C}$  NMR ( $\text{CDCl}_3$ , 75 MHz)  $\delta$  = 14.3, 20.7, 27.4, 61.1, 111.1, 133.8, 142.3, 148.6, 161.6, 162.2; IR (KBr)  $\nu$  3157.5, 2981.0, 2936.5, 2913.8, 1742.6, 1719.4, 1659.4, 1575.8, 1564.1, 1448.1, 1370.7, 1333.0, 1316.2, 1278.3, 1224.1, 1177.3, 1112.9, 1025.3, 985.4, 944.3, 832.3, 766.2, 722.0, 473.9  $\text{cm}^{-1}$ ; Anal. Calcd for  $\text{C}_{10}\text{H}_{13}\text{NO}_3$  (195.2): C, 61.53; H, 6.71; N, 7.18. Found: C, 61.37; H, 6.62; N, 7.15.

### Ethyl 2-(prop-1-en-2-yl)oxazole-4-carboxylate (**3b**)

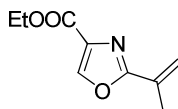

According the general procedure using **1** with 2-bromopropene (63  $\mu$ l, 0.70 mmol). Standard workup followed by flash chromatography (AcOEt/PE 1:9, Rf = 0.31) afforded **3b** (55%) as a colourless oil.  $^1\text{H}$  NMR ( $\text{CDCl}_3$ , 300 MHz)  $\delta$  = 1.37 (t, 3H,  $J$  = 7.2 Hz), 2.19 (s, 3H), 4.39 (q, 2H,  $J$  = 7.2 Hz), 5.46 (s, 1H), 6.02 (s, 1H), 8.15 (s, 1H);  $^{13}\text{C}$  NMR ( $\text{CDCl}_3$ , 75 MHz)  $\delta$  = 14.4, 19.2, 61.4, 120.1, 131.3, 134.4, 143.7, 161.5, 163.4; IR (KBr)  $\nu$  3448.7, 3160.3, 2985.9, 1736.2, 1577.6, 1542.3, 1372.6, 1316.8, 1177.1, 1115.9, 1023.0, 766.5  $\text{cm}^{-1}$ ; Anal. Calcd for  $\text{C}_9\text{H}_{11}\text{NO}_3$  (181.2): C, 59.66; H, 6.12; N, 7.73. Found: C, 59.51; H, 5.98; N, 7.64.

**(E)-Ethyl 2-(but-2-en-2-yl)oxazole-4-carboxylate (3c)**

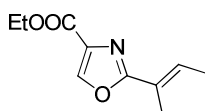

According to the general procedure using **1** with (*E*)-2-bromobut-2-ene (72  $\mu$ l, 0.70 mmol). Standard workup followed by flash chromatography (AcOEt/PE 1:9,  $R_f$  = 0.29) afforded **3c** (97%) as a colourless oil. (*Z*)  $^1\text{H}$  NMR ( $\text{CDCl}_3$ , 300 MHz)  $\delta$  = 1.36 (t, 3H,  $J$  = 7.1 Hz), 1.84 (dd, 3H,  $J$  = 1.2 Hz,  $J$  = 7.2 Hz), 2.07 (dd, 3H,  $J$  = 1.2 Hz,  $J$  = 2.4 Hz), 4.37 (q, 2H,  $J$  = 7.1 Hz), 6.67-6.74 (m, 1H), 8.10 (s, 1H);  $^{13}\text{C}$  NMR ( $\text{CDCl}_3$ , 75 MHz)  $\delta$  = 12.8, 14.2, 14.4, 61.3, 123.9, 131.3, 134.1, 143.2, 161.7, 164.5; IR (KBr)  $\nu$  3155.8, 2982.3, 2928.5, 1743.8, 1720.5, 1576.0, 1530.6, 1447.8, 1370.4, 1333.5, 1315.9, 1291.5, 1226.4, 1151.9, 1114.3, 1024.4, 983.1, 936.9, 830.1, 769.4, 733.8  $\text{cm}^{-1}$ ; Anal. Calcd for  $\text{C}_{10}\text{H}_{13}\text{NO}_3$  (195.5): C, 61.53; H, 6.71; N, 7.18. Found: C, 61.39; H, 6.64; N, 7.08.

**(Z)-ethyl 2-styryloxazole-4-carboxylate (3d)**

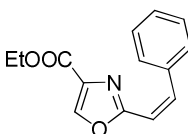

According to the general procedure using **1** with (*Z*)-(2-bromovinyl)benzene<sup>2</sup> (130 mg, 0.70 mmol). Standard workup followed by flash chromatography (AcOEt/PE 1:9,  $R_f$  = 0.34) afforded **3d** (60%) as a yellow oil.  $^1\text{H}$  NMR ( $\text{CDCl}_3$ , 300 MHz)  $\delta$  = 1.39 (t, 3H,  $J$  = 6.9 Hz), 4.39 (q, 2H,  $J$  = 6.9 Hz), 6.47 (d, 1H,  $J$  = 12.8 Hz), 7.00 (d, 1H,  $J$  = 12.8 Hz), 7.35-7.38 (m, 3H), 7.49-7.53 (m, 2H), 8.06 (s, 1H);  $^{13}\text{C}$  NMR ( $\text{CDCl}_3$ , 75 MHz)  $\delta$  = 14.4, 61.4, 114.3, 128.3, 128.9, 129.3, 134.4, 135.5, 138.7, 143.2, 161.0, 161.3; Anal. Calcd for  $\text{C}_{14}\text{H}_{13}\text{NO}_3$  (243.3): C, 69.12; H, 5.39; N, 5.76. Found: C, 69.32; H, 5.28; N, 5.62.

**Ethyl 2-benzyloxazole-4-carboxylate (3e)**

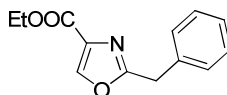

According to the general procedure using **1** with benzylchloride (82  $\mu$ l, 0.70 mmol). Standard workup followed by flash chromatography (AcOEt/PE 2:8,  $R_f$  = 0.41) afforded **3e** (86%) as a colourless oil.  $^1\text{H}$  NMR ( $\text{CDCl}_3$ , 300 MHz)  $\delta$  = 1.37 (t, 3H,  $J$  = 7.2 Hz), 4.16 (s, 2H), 4.38 (q, 2H,  $J$  = 7.2 Hz), 7.26-7.30 (m, 5H), 8.13 (s, 1H);  $^{13}\text{C}$  NMR ( $\text{CDCl}_3$ , 75 MHz)  $\delta$  = 14.5, 34.7, 61.3, 127.5, 128.9, 133.6, 134.7, 144.3, 161.4, 163.9; IR (KBr)  $\nu$  3162.9, 3088.5, 3064.2, 3031.1, 2982.2, 2931.3, 1736.5, 1582.6, 1496.1, 1455.5, 1371.5, 1316.4, 1176.7, 1109.2,

<sup>2</sup> H.C. Brown., S.K. Gupta, *J. Am. Chem. Soc.* 1972, **94**, 4370; H.C. Brown, T. Hamaoka, N. Ravindran, *J. Am. Chem. Soc.* 1973, **95**, 6456.

1024.0, 984.0, 767.6, 728.0, 697.4  $\text{cm}^{-1}$ ; Anal. Calcd for  $\text{C}_{13}\text{H}_{13}\text{NO}_3$  (231.2): C, 67.52; H, 5.67; N, 6.06. Found: C, 67.72; H, 5.55; N, 5.97.

### Ethyl 2-(4-fluorobenzyl)oxazole-4-carboxylate (**3f**)

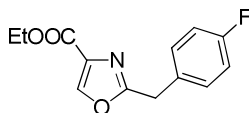

According to the general procedure using **1** with 4-fluorobenzylchloride (84  $\mu\text{l}$ , 0.70 mmol). Standard workup followed by flash chromatography (AcOEt/PE 2:8,  $R_f$  = 0.29) afforded **3f** (75%) as a yellow oil.  $^1\text{H}$  NMR ( $\text{CDCl}_3$ , 300 MHz)  $\delta$  = 1.29 (t, 3H,  $J$  = 7.1 Hz), 4.05 (s, 2H), 4.29 (q, 2H,  $J$  = 7.1 Hz), 6.89-6.95 (m, 2H), 7.16-7.21 (m, 2H), 8.06 (s, 1H);  $^{13}\text{C}$  NMR ( $\text{CDCl}_3$ , 75 MHz)  $\delta$  = 14.3, 33.8, 61.3, 115.6, 115.9, 130.4, 133.6, 144.2, 144.3, 160.5, 161.2, 163.6, 163.7; IR (KBr)  $\nu$  3162.8, 2983.0, 2929.3, 1739.6, 1583.9, 1510.3, 1371.7, 1316.9, 1224.6, 1176.9, 1159.5, 1109.2, 1023.1, 834.0, 766.1  $\text{cm}^{-1}$ ; Anal. Calcd for  $\text{C}_{13}\text{H}_{12}\text{FNO}_3$  (249.2): C, 62.65; H, 4.85; F, 7.62; N, 5.62. Found: C, 62.59; H, 4.67; F, 7.58; N, 5.55.

### Ethyl 2-(4-methoxybenzyl)oxazole-4-carboxylate (**3g**)

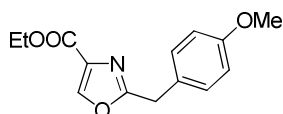

According to the general procedure using **1** with 4-methoxybenzylchloride (97  $\mu\text{l}$ , 0.70 mmol). Standard workup followed by flash chromatography (AcOEt/PE 2:8,  $R_f$  = 0.28) afforded **3g** (91%) as a white powder (mp = 53-54  $^\circ\text{C}$ ).  $^1\text{H}$  NMR ( $\text{CDCl}_3$ , 300 MHz)  $\delta$  = 1.35 (t, 3H,  $J$  = 7.2 Hz), 3.75 (s, 3H), 4.08 (s, 2H), 4.35 (q, 2H,  $J$  = 7.2 Hz), 6.83 (d, 2H,  $J$  = 8.7 Hz), 7.20 (d, 2H,  $J$  = 8.7 Hz), 8.11 (s, 1H);  $^{13}\text{C}$  NMR ( $\text{CDCl}_3$ , 75 MHz)  $\delta$  = 14.3, 33.7, 55.3, 61.2, 114.20, 126.6, 129.9, 133.5, 144.1, 144.2, 158.9, 161.3, 164.2; IR (KBr)  $\nu$  3138.6, 3097.2, 2963.8, 2937.7, 2837.7, 1725.4, 1612.4, 1587.0, 1513.9, 1299.3, 1252.0, 1175.8, 1138.8, 1106.8, 1033.7, 985.7, 831.3, 787.1, 773.2, 665.6, 555.5, 514.6  $\text{cm}^{-1}$ ; Anal. Calcd for  $\text{C}_{14}\text{H}_{15}\text{NO}_4$  (261.3): C, 64.36; H, 5.79; N, 5.36. Found: C, 64.43; H, 5.77; N, 5.28.

### Ethyl 2-(naphthalen-2-ylmethyl)oxazole-4-carboxylate (**3h**)

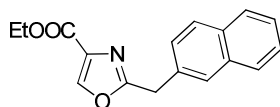

According to the general procedure using **1** with 1-(chloromethyl)naphthalene (106  $\mu\text{l}$ , 0.70 mmol). Standard workup followed by flash chromatography (AcOEt/PE 2:8,  $R_f$  = 0.33) afforded **3h** (80%) as a brown oil.  $^1\text{H}$  NMR ( $\text{CDCl}_3$ , 300 MHz)  $\delta$  = 1.37 (t, 3H,  $J$  = 7.2 Hz),

4.38 (q, 2H,  $J = 7.2$  Hz), 4.60 (s, 2H), 7.43 (d, 2H,  $J = 4.8$  Hz), 7.49-7.54 (m, 2H), 7.79-7.82 (t, 1H,  $J = 4.8$  Hz), 7.85 (d 1H,  $J = 7.6$  Hz), 8.06 (s, 1H), 8.11 (d, 1H,  $J = 7.6$  Hz);  $^{13}\text{C}$  NMR ( $\text{CDCl}_3$ , 75 MHz)  $\delta = 14.4, 32.5, 61.3, 123.7, 125.6, 126.0, 126.7, 127.7, 128.5, 128.8, 130.8, 131.8, 133.6, 133.9, 144.2, 161.4, 163.9$ ; IR (KBr)  $\nu 3162.1, 3049.0, 2925.3, 2854.5, 1731.8, 1582.5, 1511.5, 1396.4, 1316.6, 1108.9, 1021.2, 785.7$   $\text{cm}^{-1}$ ; Anal. Calcd for  $\text{C}_{17}\text{H}_{15}\text{NO}_3$  (281.3): C, 72.58; H, 5.37; N, 4.98. Found: C, 72.51; H, 5.22; N, 4.75.

### (*E*)-Ethyl 2-(prop-1-enyl)oxazole-4-carboxylate (**3i**)

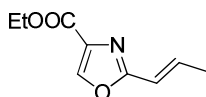

According to the general procedure using **1** with allylchloride (58  $\mu\text{l}$ , 0.70 mmol). Standard workup followed by flash chromatography (AcOEt/PE 2:8,  $R_f = 0.31$ ) afforded **3i** (97%) as a colourless oil.  $^1\text{H}$  NMR ( $\text{CDCl}_3$ , 300 MHz)  $\delta = 1.37$  (t, 3H,  $J = 7.1$  Hz), 1.94 (dd, 3H,  $J = 1.8$  Hz,  $J = 6.9$  Hz), 4.38 (q, 2H,  $J = 7.1$  Hz), 6.33 (dd, 1H,  $J = 1.8$  Hz,  $J = 15.9$  Hz), 6.77-6.89 (m, 1H), 8.11 (s, 1H);  $^{13}\text{C}$  NMR ( $\text{CDCl}_3$ , 75 MHz)  $\delta = 14.5, 18.7, 61.3, 117.3, 134.8, 137.8, 143.1, 161.6, 161.2$ ; IR (KBr)  $\nu 2924.2, 2854.4, 1742.0, 1721.7, 1666.8, 1575.1, 1544.2, 1446.1, 1371.3, 1317.0, 1145.6, 1113.6, 1024.4, 964.4, 764.4, 703.2$   $\text{cm}^{-1}$ ; Anal. Calcd for  $\text{C}_9\text{H}_{11}\text{NO}_3$  (181.2): C, 59.66; H, 6.12; N, 7.73. Found: C, 59.52; H, 5.98; N, 7.54.

### Ethyl 2-butylloxazole-4-carboxylate (**3j**)

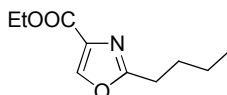

According to the general procedure using **1** with bromobutane (77  $\mu\text{l}$ , 0.70 mmol). Standard workup followed by flash chromatography (AcOEt/PE 1:9,  $R_f = 0.26$ ) afforded **3j** (60%) as a colourless oil.  $^1\text{H}$  NMR ( $\text{CDCl}_3$ , 300 MHz)  $\delta = 0.90$  (t, 3H,  $J = 7.5$  Hz), 1.32-1.37 (m, 6H), 1.73 (m, 2H), 2.78 (t, 2H,  $J = 7.8$  Hz), 4.45 (q, 2H,  $J = 7.2$  Hz), 8.11 (s, 1H);  $^{13}\text{C}$  NMR ( $\text{CDCl}_3$ , 75 MHz)  $\delta = 13.8, 14.6, 22.4, 28.0, 29.2, 61.3, 133.6, 143.8, 161.7, 166.2$ ; IR (KBr)  $\nu 3158.7, 2961.0, 2934.6, 2874.2, 1743.7, 1586.5, 1466.3, 1370.9, 1316.9, 1143.2, 1110.4, 1024.3, 979.9, 833.6, 771.8$   $\text{cm}^{-1}$ ; Anal. Calcd for  $\text{C}_{10}\text{H}_{15}\text{NO}_3$  (197.2): C, 60.90; H, 7.67; N, 7.10. Found: C, 60.72; H, 7.63; N, 6.96.

### Ethyl 2-methyloxazole-4-carboxylate (**3l**)

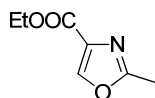

According the general procedure using **1** with iodomethane (44  $\mu$ l, 0.70 mmol). Standard workup followed HPLC on silica gel (Li-chrosorb 10  $\mu$ m) (AcOEt/PE 4:6,  $R_f$  = 0.35) afforded **3l** (41%) as a white oil.  $^1\text{H}$  NMR ( $\text{CDCl}_3$ , 300 MHz)  $\delta$  = 1.33 (t, 3H,  $J$  = 7.2 Hz), 2.46 (s, 3H), 4.32 (q, 2H,  $J$  = 7.2 Hz), 8.09 (s, 1H);  $^{13}\text{C}$  NMR ( $\text{CDCl}_3$ , 75 MHz)  $\delta$  = 13.9, 14.3, 61.2, 133.5, 143.7, 161.4, 162.4; IR (KBr)  $\nu$  3126.0, 2984.3, 2936.3, 1740.6, 1592.7, 1445.8, 1371.4, 1337.5, 1317.3, 1295.8, 1219.1, 1146.4, 1110.2, 1029.6, 908.8, 832.0, 771.0, 674.2  $\text{cm}^{-1}$ ; Anal. Calcd for  $\text{C}_7\text{H}_9\text{NO}_3$  (155.1): C, 54.19; H, 5.85; N, 9.03. Found: C, 54.08; H, 5.78; N, 8.95.

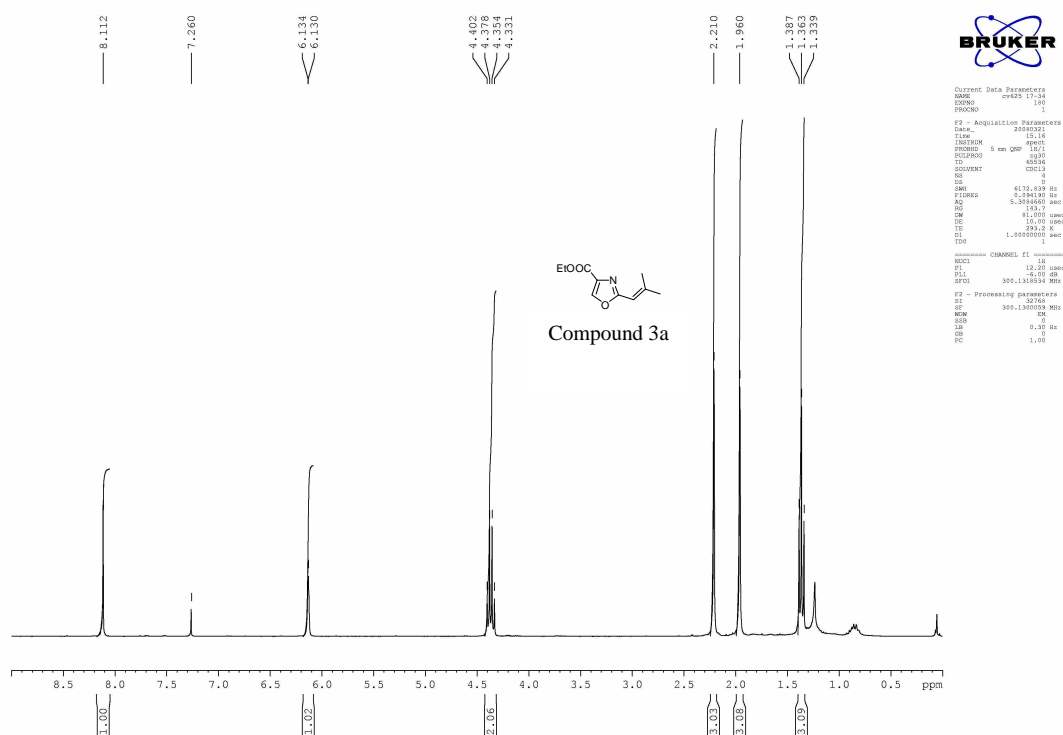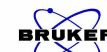

Current Data Parameters  
 NAME: ev425 17-34  
 EXPNO: 1  
 PROCNO: 1  
 F2 - Acquisition Parameters  
 Date\_ : 20080321  
 Time : 12.16  
 INSTRUM : spect  
 PROCNO : 1  
 F2PROG : 5 nm QNP  
 ID : 40294  
 ACQUNIT : QNP11  
 DS : 4  
 SWH : 6174.00 Hz  
 FIDRES : 5.294190 Hz  
 AQ : 5.308460 sec  
 RG : 143.7  
 SW : 81.000 MHz  
 DE : 15.00 dB  
 TE : 294.2 K  
 D1 : 1.0000000 sec  
 D11 :  
 D12 :  
 D13 :  
 ===== CHANNEL f1 =====  
 NUC1 : 13  
 P1 : 12.00 dB  
 PL1 : 305.130293 MHz  
 SFO1 : 305.130293 MHz  
 F2 - Processing parameters  
 SI : 32  
 SF : 305.130293 MHz  
 DSF : 82  
 SSB : 0  
 GB : 0.30 Hz  
 PC : 1.00

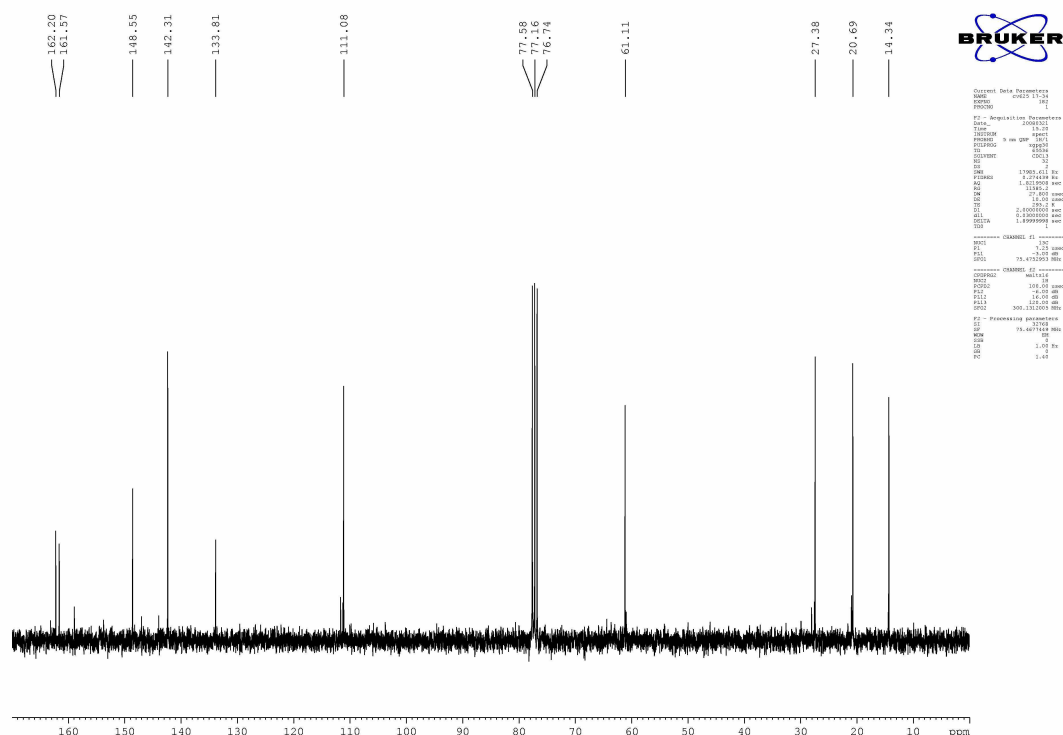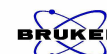

Current Data Parameters  
 NAME: ev425 17-34  
 EXPNO: 1  
 PROCNO: 1  
 F2 - Acquisition Parameters  
 Date\_ : 20080321  
 Time : 12.16  
 INSTRUM : spect  
 PROCNO : 1  
 F2PROG : 5 nm QNP  
 ID : 40294  
 ACQUNIT : QNP11  
 DS : 4  
 SWH : 15980.00 Hz  
 FIDRES : 1.274488 Hz  
 AQ : 1.021000 sec  
 RG : 1114.1  
 SW : 22.800 MHz  
 DE : 15.00 dB  
 TE : 294.2 K  
 D1 : 2.0000000 sec  
 D11 : 1.8000000 sec  
 D12 : 1.8999999 sec  
 D13 :  
 ===== CHANNEL f1 =====  
 NUC1 : 13  
 P1 : 12.00 dB  
 PL1 : 125.761170 MHz  
 SFO1 : 125.761170 MHz  
 F2 - Processing parameters  
 SI : 32  
 SF : 125.761170 MHz  
 DSF : 82  
 SSB : 0  
 GB : 0.30 Hz  
 PC : 1.00

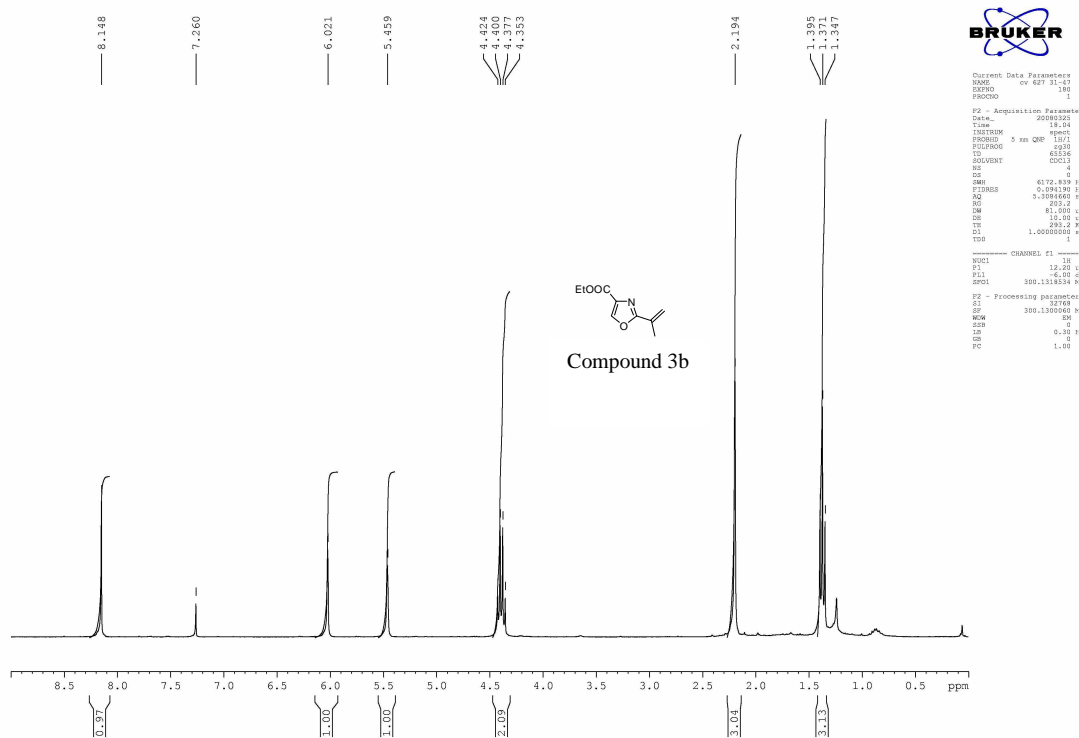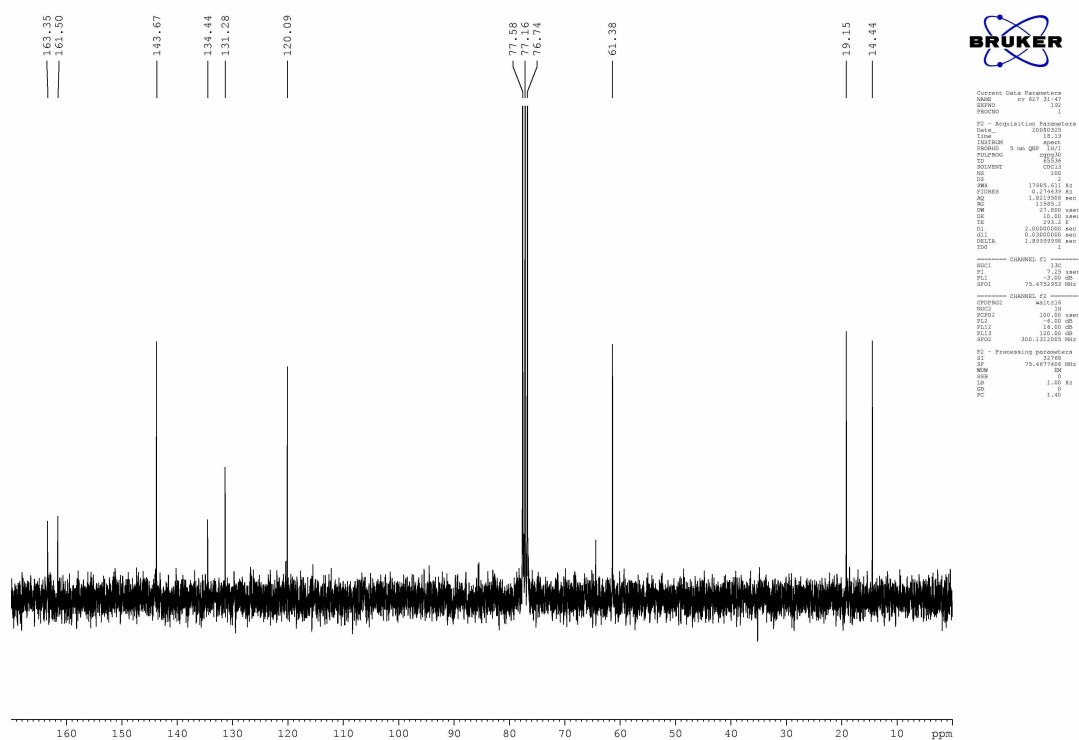



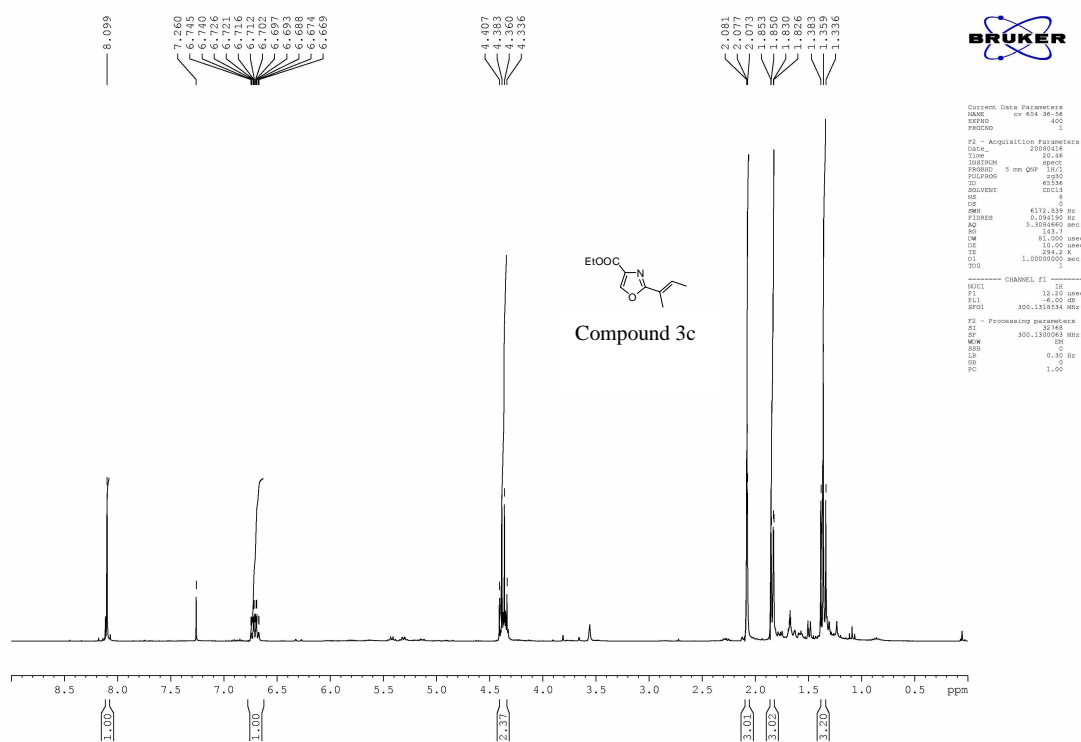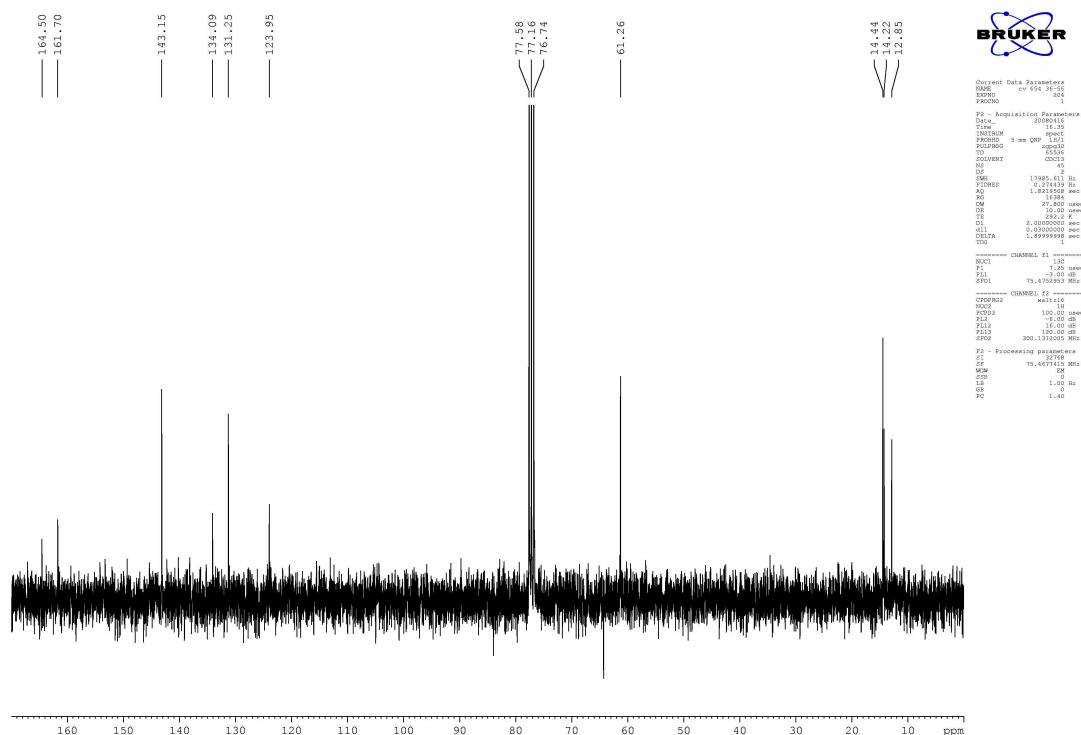

Supplement: b816374j.pdf [file b816374j.pdf]
